# Supplementary material for: Enhancement of the capacitive performance of Ni2CoS4 by incorporation of graphitized carbon dots
Source: Royal Society of Chemistry journal article supplement (doi:10.1039/d3nj00186e), 2023-01-01
Supplement: d3nj00186e1.pdf [file d3nj00186e1.pdf]

**Enhancement of capacitive performance of  $\text{Ni}_2\text{CoS}_4$  by incorporation of graphitized carbon dots**

Honglin Yu <sup>1,2</sup>, Shuihua Tang<sup>1,2,\*</sup>, Xiaohan Wang<sup>1,2</sup>, Shuang Yang <sup>1,2</sup>, Xiang Zhong<sup>1,2</sup>, Limei Yu<sup>1,2</sup>, Yuhang Xie<sup>1,2</sup>, Mingjie Xu<sup>1,2</sup>, Hongxi Xiong<sup>1,2</sup>, Lei Zhang<sup>1,3,\*</sup>

<sup>1</sup> State Key Lab of Oil and Gas Reservoir Geology & Exploitation, Southwest Petroleum University, Chengdu 610500, P R China.

<sup>2</sup> School of New Energy and Materials, Southwest Petroleum University, Chengdu 610500, P R China

<sup>3</sup> School of Chemistry and Chemical Engineering, Southwest Petroleum University, Chengdu 610500, P R China

\* Corresponding author. Shuihua Tang, Tel: +86-2883032879, E-mail: [spraytang@hotmail.com](mailto:spraytang@hotmail.com)

Lei Zhang, Tel: +86-2883037334, E-mail: [zgc166929@aliyun.com](mailto:zgc166929@aliyun.com)

### The preparation of activate carbon (AC) electrode

Untreated AC was used as the active material and mixed with carbon nanotubes (conductive agent) and Nafion solution (binder) with a mass ratio of 80:15:5 and dispersed in 2 mL of ethanol under ultrasonication to obtain slurry. The slurry was coated on nickel foam and the mass loading of AC was controlled to  $1 \text{ mg cm}^{-2}$ . The electrochemical properties of AC were measured in 6 M KOH solution using a conventional three-electrode cell, platinum electrode, and Hg/HgO electrode were used as counter and reference electrodes, respectively.

### Content:

**Fig. S1** (a) Resistivity and (b) Raman spectrum of GCDs.

**Fig. S2** (a, b) SEM images of  $\text{Ni}_2\text{CoS}_4$ .

**Fig. S3** (a-e) Elemental mappings of  $\text{Ni}_2\text{CoS}_4$ /GCDs composite by EDS.

**Fig. S4** (a) CV curves, (b) GCD curves of  $\text{Ni}_2\text{CoS}_4$ .

**Fig. S5** (a) CV curves, (b) GCD curves of  $\text{Ni}_2\text{CoS}_4$ /GCDs-6.

**Fig. S6** (a) CV curves, (b) GCD curves of  $\text{Ni}_2\text{CoS}_4$ /GCDs-12.

**Fig. S7** (a) CV curves, (b) GCD curves of AC.

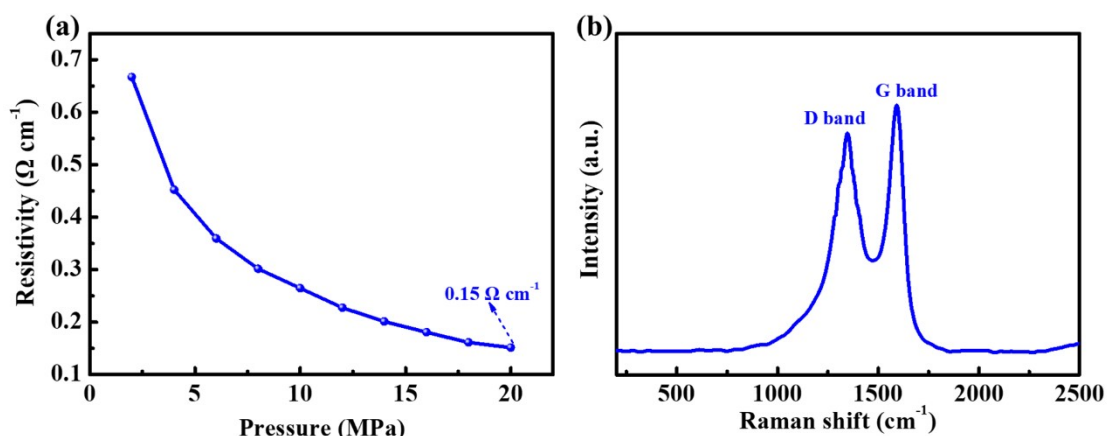

**Fig. S1** (a) Resistivity and (b) Raman spectrum of GCDs.

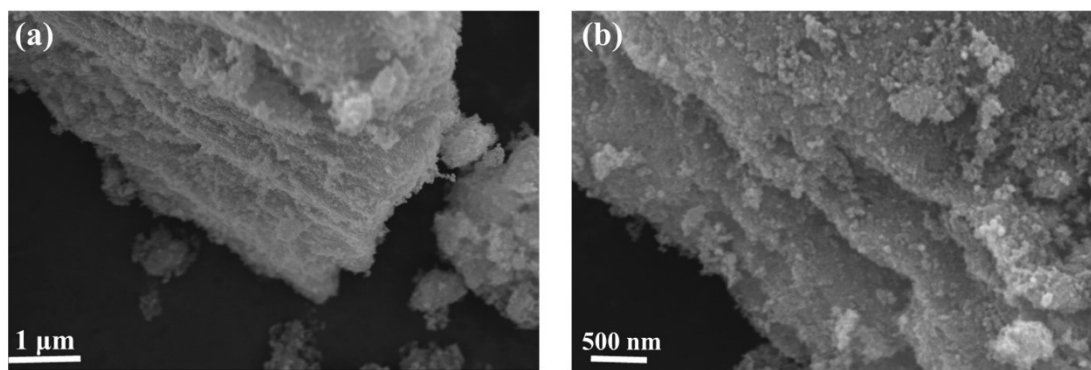

**Fig. S2** (a, b) SEM images of  $\text{Ni}_2\text{CoS}_4$ .

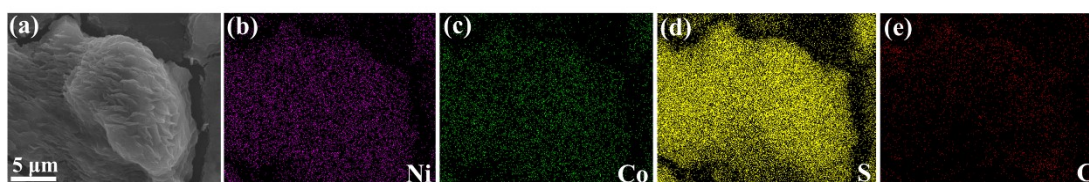

**Fig. S3** (a-e) Elemental mappings of  $\text{Ni}_2\text{CoS}_4/\text{GCDs}$  composite by EDS.

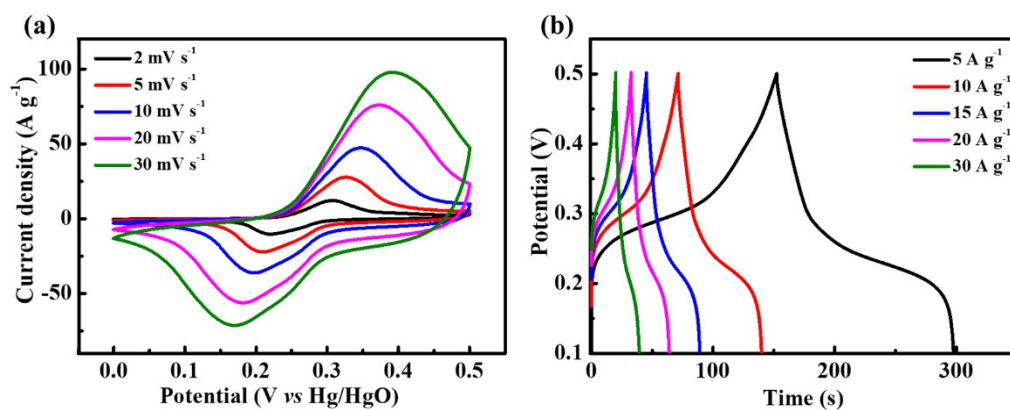

**Fig. S4** (a) CV curves, (b) GCD curves of  $\text{Ni}_2\text{CoS}_4$ .

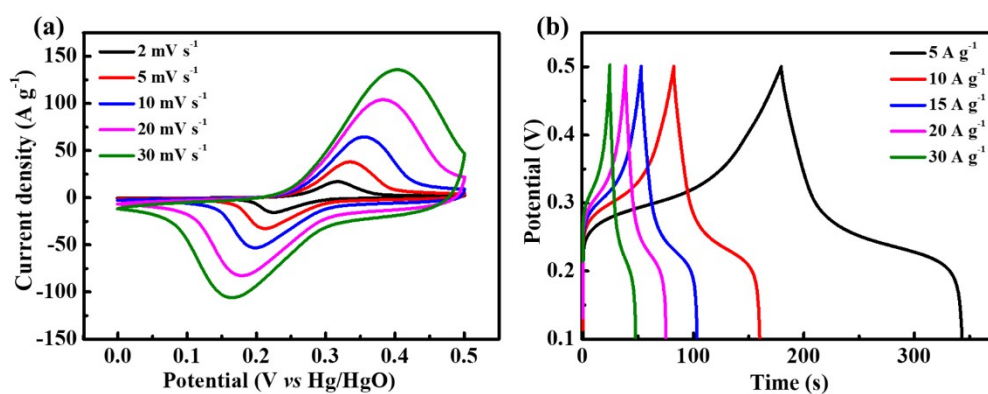

**Fig. S5** (a) CV curves, (b) GCD curves of  $\text{Ni}_2\text{CoS}_4/\text{GCDs-6}$ .

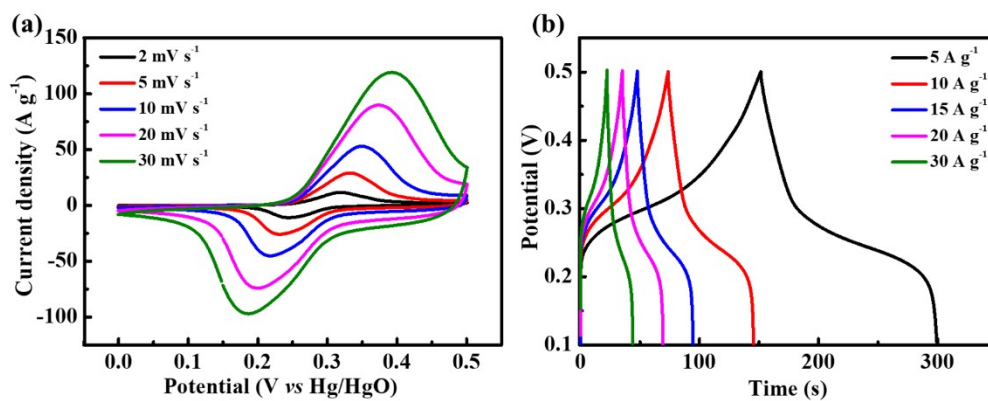

**Fig. S6** (a) CV curves, (b) GCD curves of  $\text{Ni}_2\text{CoS}_4/\text{GCDs-12}$ .

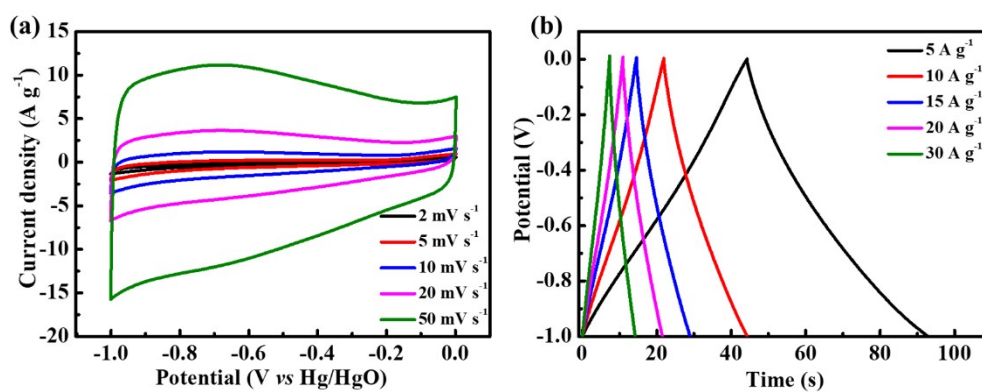

**Fig. S7** (a) CV curves, (b) GCD curves of AC.
